# Supplementary material for: Effect of Sn Doping on Pd Electro-Catalysts for Enhanced Electro-Catalytic Activity towards Methanol and Ethanol Electro-Oxidation in Direct Alcohol Fuel Cells
Source: Nanomaterials (Basel). 2021 Oct 15;11(10):2725. doi: 10.3390/nano11102725 (PMC8537662; doi:10.3390/nano11102725)
Supplement: Supplementary file 1 [file nanomaterials-11-02725-s001.zip › nanomaterials-1377530-supplementary.pdf]

## Supplementary materials

# Effect of Sn Doping on Pd Electro-catalysts for Enhanced Electro-catalytic Activity Towards Methanol and Ethanol Electro-oxidation in Direct Alcohol Fuel Cells

Cyril. T. Selepe<sup>1</sup>, Sandile. S. Gwebu<sup>1</sup>, Thabo. Matthews<sup>1</sup>, Tebogo. A. Mashola<sup>1</sup>, Ludwe. L. Sikeyi<sup>2</sup>, Memory. Zikhali<sup>1</sup> and Nobanathi. W. Maxakato<sup>1</sup>

<sup>1</sup> Department of Chemical Sciences, University of Johannesburg, Doornfontein 2028, South Africa.

<sup>2</sup> Molecular Sciences Institute, School of Chemistry, University of the Witwatersrand, Braamfontein 2050, South Africa;

\* Correspondence: nmaxakato@uj.ac.za; Tel.: +27 (0) 11 559 6151

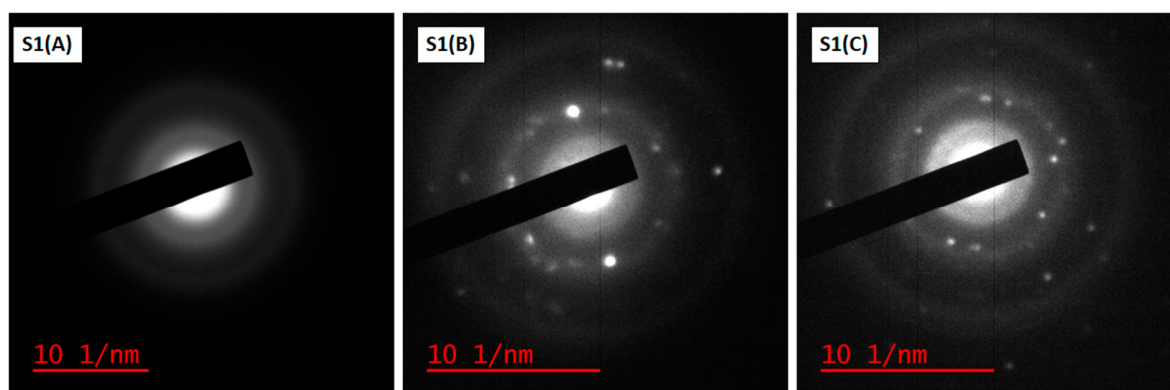

Figure S1 Shows selected area electron diffraction pattern of carbon nano-onions (A), Pd/C (B) and Pd-Sn/CNOs (C) electro-catalysts.

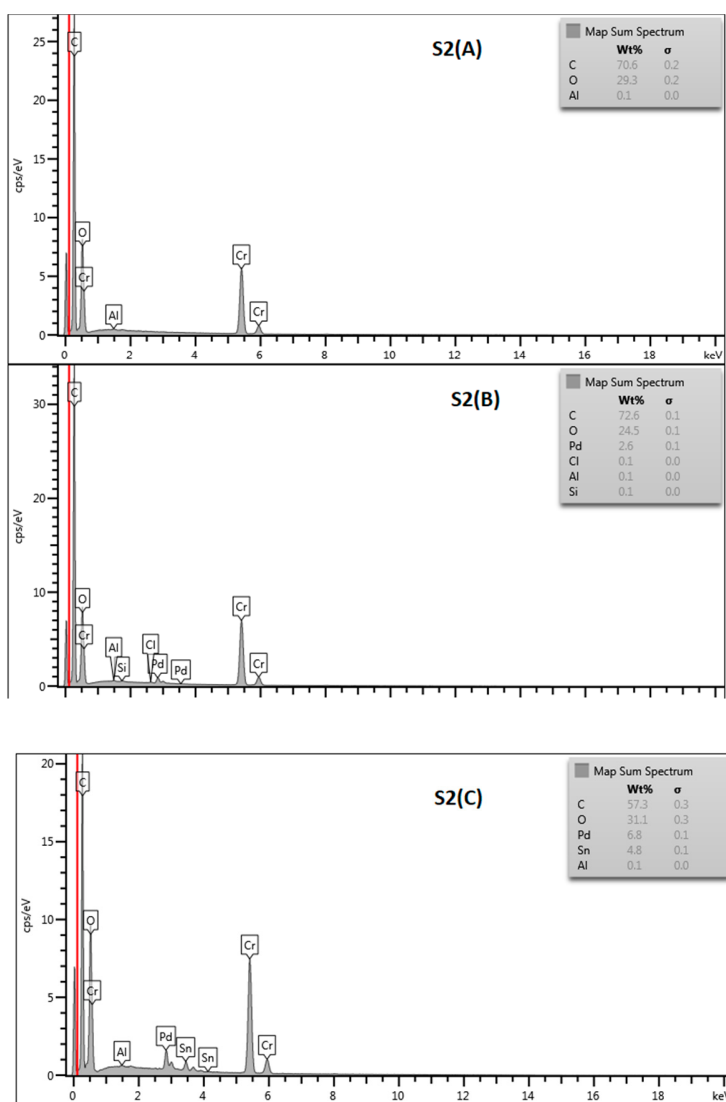

Figure S2: depicts the EDX spectrum of carbon nano-onions support (A), Pd/CNOs (B) and Pd-Sn/CNOs (C) electro-catalysts.

EDS Layered Image 6

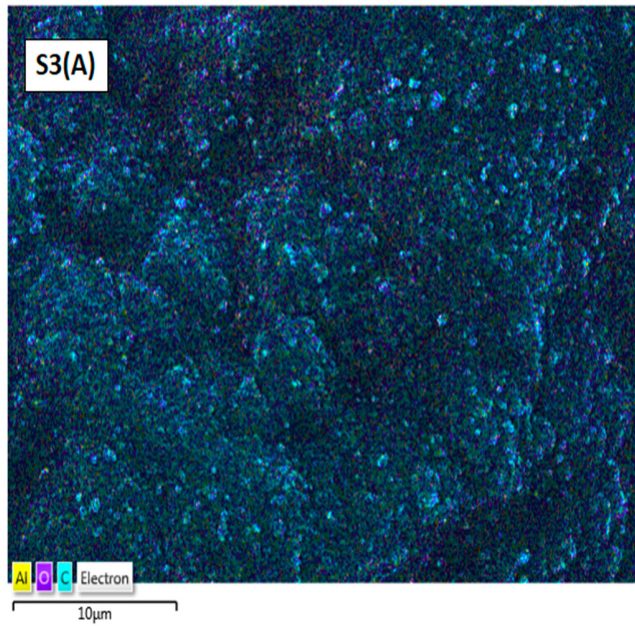

C K $\alpha$ 1\_2

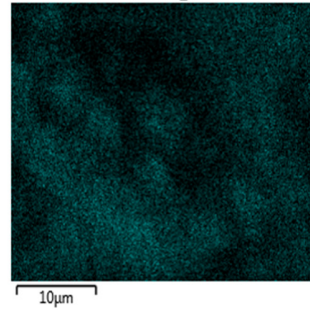

O K $\alpha$ 1

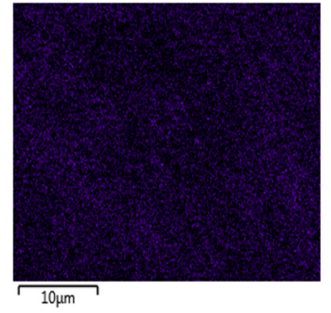

Al K $\alpha$ 1

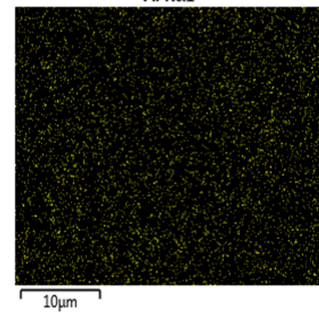

EDS Layered Image 4

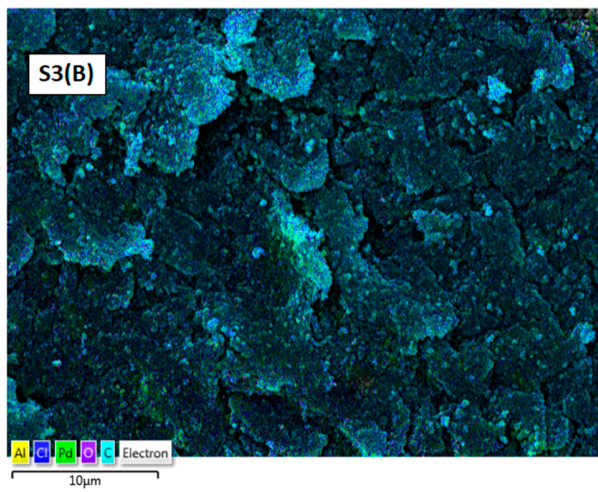

C K $\alpha$ 1\_2

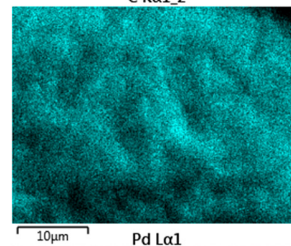

O K $\alpha$ 1

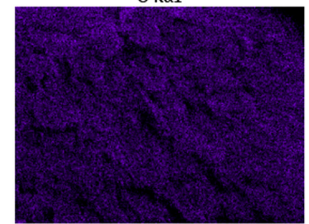

Pd L $\alpha$ 1

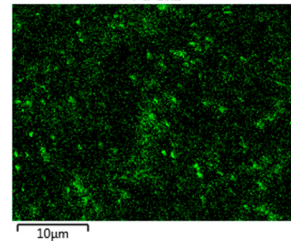

Al K $\alpha$ 1

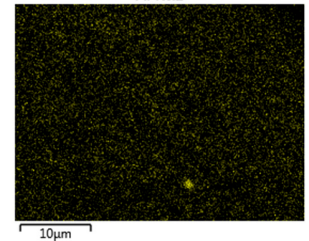

Cl K $\alpha$ 1

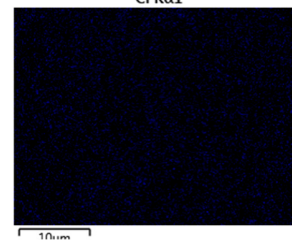

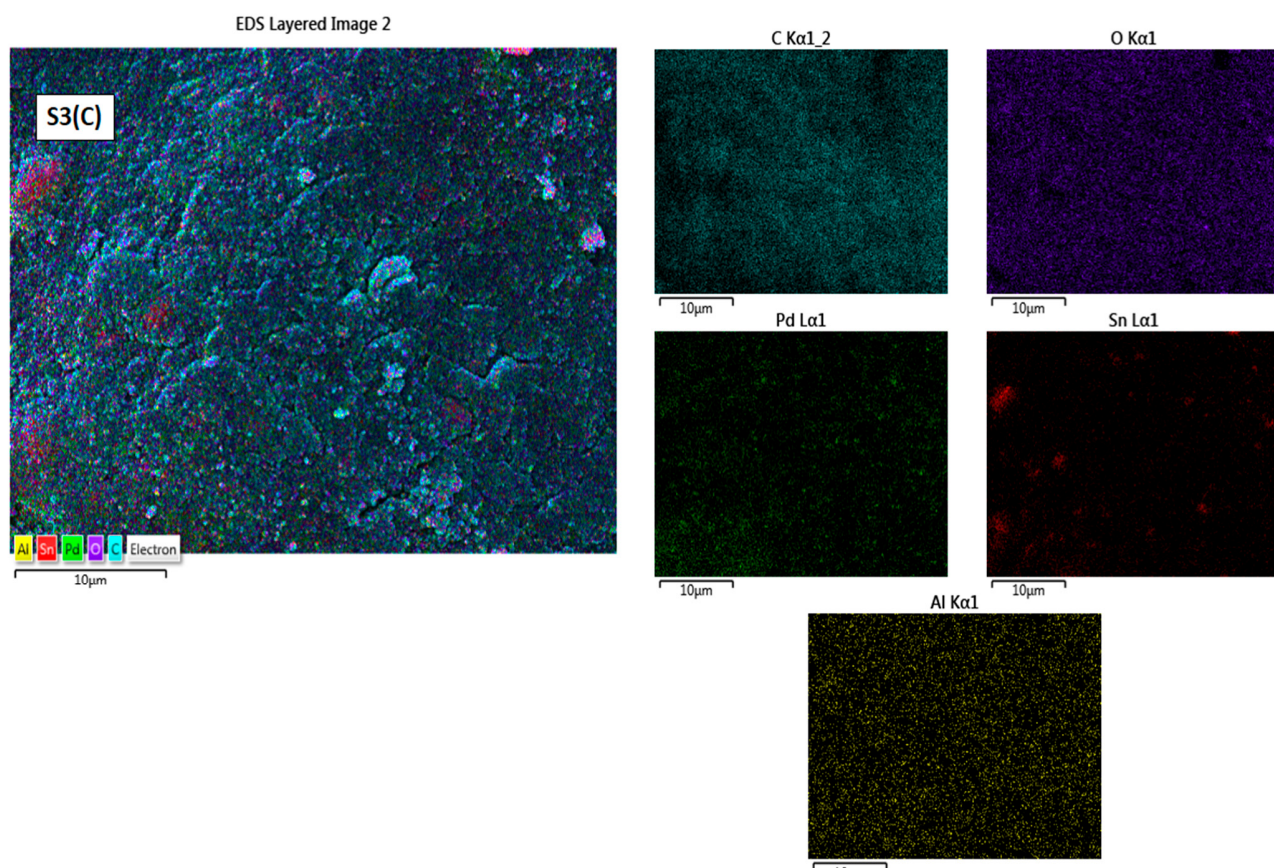

Figure S3: shows the elemental mapping of carbon nano-onions support (A), Pd/CNOs (B) and Pd-Sn/CNOs (C) electro-catalysts.

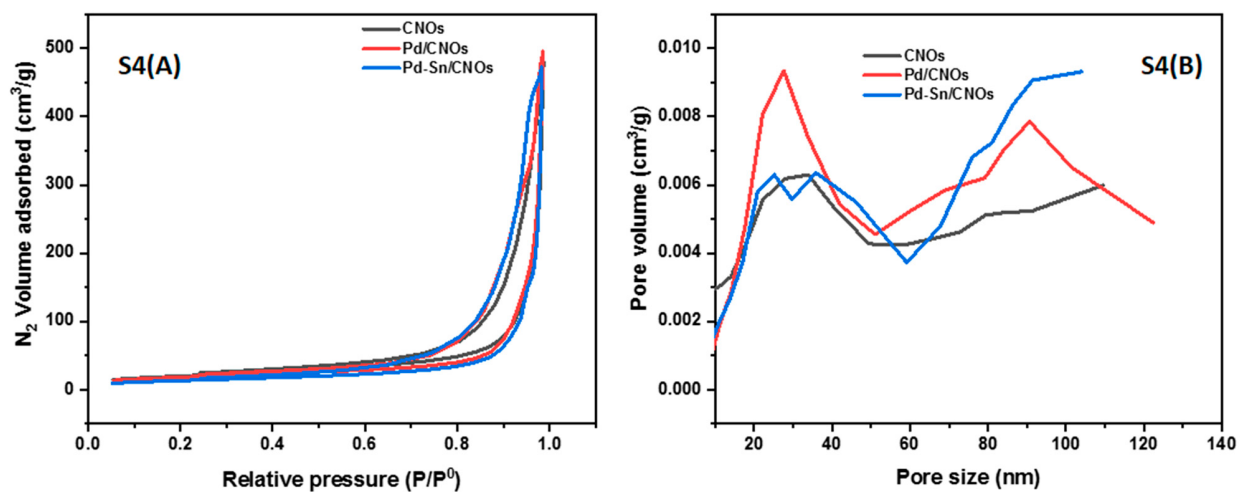

Figure S4: Shows the N<sub>2</sub> adsorption-desorption isotherms (A) and BJH desorption pore-size distribution (B).

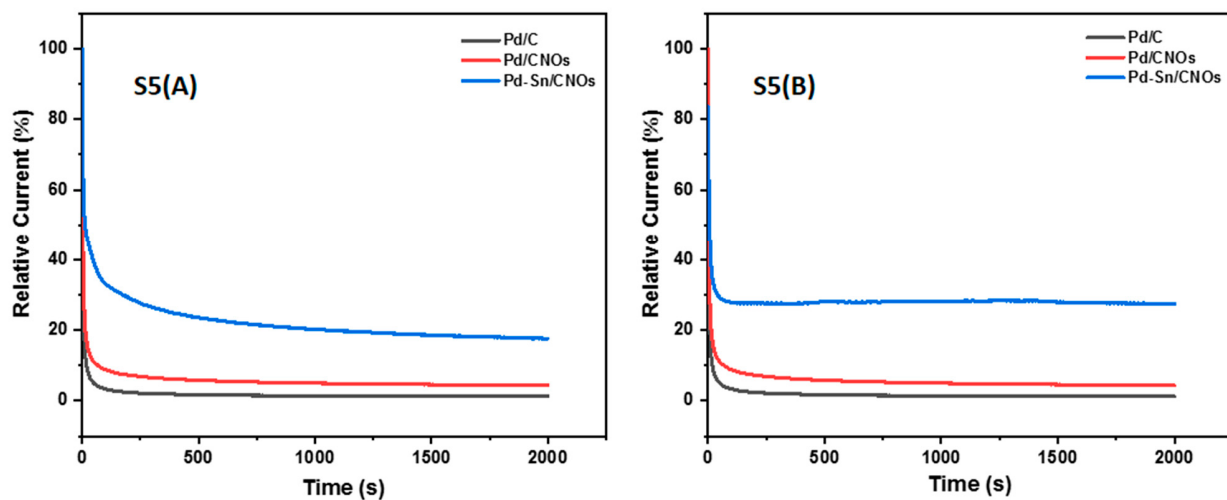

Figure S5 (A): display the chronoamperometric curve of Pd/C, Pd/CNOs and Pd-Sn/CNOs electro-catalysts in 1 M KOH + 1 M CH<sub>3</sub>OH solution and (B) in 1 M KOH + 1 M CH<sub>3</sub>CH<sub>2</sub>OH solution.
